# Supplementary material
Source: ML conference proceedings conference paper supplement (https://proceedings.neurips.cc/paper_files/paper/2022/hash/342339109d7d756ef7bb30cf672aec02-Abstract.html)
Supplement: Supplementary file 1 [file 342339109d7d756ef7bb30cf672aec02-Supplemental-Conference.zip]

Archive with 163 entries (121 files):
- T1_code/
- T1_code/README.md
- T1_code/analysis/
- T1_code/analysis/latent_1d_benchmark_results.json
- T1_code/analysis/latent_2d_benchmark_results.json
- T1_code/benchmark/
- T1_code/benchmark/speedup/
- T1_code/benchmark/speedup/wall_clock_fno_vs_latent_1d.py
- T1_code/benchmark/speedup/wall_clock_fno_vs_latent_1d_layers.py
- T1_code/benchmark/speedup/wall_clock_fno_vs_latent_2d.py
- T1_code/benchmark/speedup/wall_clock_fno_vs_latent_2d_layers.py
- T1_code/configs/
- T1_code/configs/callbacks/
- T1_code/configs/callbacks/default.yaml
- T1_code/configs/callbacks/log_recons_metrics.yaml
- T1_code/configs/callbacks/logimg_recons.yaml
- T1_code/configs/datamodule/
- T1_code/configs/datamodule/dfpfull.yaml
- T1_code/configs/datamodule/dfpfull_low_memory.yaml
- T1_code/configs/datamodule/navier_stokes.yaml
- T1_code/configs/datamodule/scalarflow.yaml
- T1_code/configs/default_config.yaml
- T1_code/configs/experiment/
- T1_code/configs/experiment/dfp128/
- T1_code/configs/experiment/dfp128/ffno.yaml
- T1_code/configs/experiment/dfp128/fno2d.yaml
- T1_code/configs/experiment/dfp128/t1.yaml
- T1_code/configs/experiment/dfp128/t1u.yaml
- T1_code/configs/experiment/dfp128/unet.yaml
- T1_code/configs/experiment/dfp128/vit.yaml
- T1_code/configs/experiment/dfp128/vitdyn-fno-pretrained-single-opt.yaml
- T1_code/configs/experiment/dfp128/vitdyn-fno-pretrained.yaml
- T1_code/configs/experiment/dfp128/vitdyn-fno.yaml
- T1_code/configs/experiment/navier-stokes/
- T1_code/configs/experiment/navier-stokes/ffno.yaml
- T1_code/configs/experiment/navier-stokes/fno.yaml
- T1_code/configs/experiment/navier-stokes/founder.yaml
- T1_code/configs/experiment/navier-stokes/t1.yaml
- T1_code/configs/experiment/navier-stokes/t1u.yaml
- T1_code/configs/experiment/navier-stokes/unet.yaml
- T1_code/configs/experiment/scalarflow/
- T1_code/configs/experiment/scalarflow/fno.yaml
- T1_code/configs/experiment/scalarflow/t1.yaml
- T1_code/configs/experiment/scalarflow/t1u.yaml
- T1_code/configs/logger/
- T1_code/configs/logger/wandb.yaml
- T1_code/configs/metrics/
- T1_code/configs/metrics/direct-nll.yaml
- T1_code/configs/metrics/l1.yaml
- T1_code/configs/metrics/mse.yaml
- T1_code/configs/metrics/psnr.yaml
- T1_code/configs/metrics/relativel1.yaml
- T1_code/configs/metrics/relativel1_dct.yaml
- T1_code/configs/metrics/smape.yaml
- T1_code/configs/metrics/timeseries/
- T1_code/configs/metrics/timeseries/mae.yaml
- T1_code/configs/metrics/timeseries/psnr.yaml
- T1_code/configs/metrics/timeseries/smape.yaml
- T1_code/configs/mode/
- T1_code/configs/mode/default.yaml
- T1_code/configs/model/
- T1_code/configs/model/dfpnet.yaml
- T1_code/configs/model/ffno2d.yaml
- T1_code/configs/model/fno2d.yaml
- T1_code/configs/model/t1_1d.yaml
- T1_code/configs/model/t1_2d.yaml
- T1_code/configs/model/t1u_2d.yaml
- T1_code/configs/model/unet.yaml
- T1_code/configs/optimizer/
- T1_code/configs/optimizer/adam.yaml
- T1_code/configs/optimizer/adamw.yaml
- T1_code/configs/scheduler/
- T1_code/configs/scheduler/step.yaml
- T1_code/configs/task/
- T1_code/configs/task/default.yaml
- T1_code/configs/trainer/
- T1_code/configs/trainer/default.yaml
- T1_code/hollow/
- T1_code/hollow/__init__.py
- T1_code/hollow/callbacks/
- T1_code/hollow/callbacks/gpu_affinity.py
- T1_code/hollow/callbacks/model_checkpoint.py
- T1_code/hollow/callbacks/model_specific.py
- T1_code/hollow/callbacks/params_log.py
- T1_code/hollow/callbacks/speed_monitor.py
- T1_code/hollow/callbacks/wandb_callbacks.py
- T1_code/hollow/datamodules/
- T1_code/hollow/datamodules/__init__.py
- T1_code/hollow/datamodules/basic_pde.py
- T1_code/hollow/datamodules/datasets/
- T1_code/hollow/datamodules/datasets/dfp.py
- T1_code/hollow/datamodules/datasets/dfp512.py
- T1_code/hollow/datamodules/datasets/scalarflow.py
- T1_code/hollow/datamodules/datasets/utils.py
- T1_code/hollow/datamodules/dfp.py
- T1_code/hollow/datamodules/dfp512.py
- T1_code/hollow/datamodules/scalarflow.py
- T1_code/hollow/eval.py
- T1_code/hollow/losses/
- T1_code/hollow/losses/__init__.py
- T1_code/hollow/losses/relative.py
- T1_code/hollow/losses/relative_l2.py
- T1_code/hollow/metrics/
- T1_code/hollow/metrics/relative.py
- T1_code/hollow/metrics/timeseries_metrics.py
- T1_code/hollow/models/
- T1_code/hollow/models/__init__.py
- T1_code/hollow/models/dfpnet.py
- T1_code/hollow/models/ffno.py
- T1_code/hollow/models/fno.py
- T1_code/hollow/models/layers/
- T1_code/hollow/models/layers/fdm1d.py
- T1_code/hollow/models/layers/fdm2d.py
- T1_code/hollow/models/modules/
- T1_code/hollow/models/modules/masking.py
- T1_code/hollow/models/modules/seq_common.py
- T1_code/hollow/models/modules/vision_common.py
- T1_code/hollow/models/t1.py
- T1_code/hollow/optim/
- T1_code/hollow/optim/__init__.py
- T1_code/hollow/optim/param_grouping.py
- T1_code/hollow/tasks/
- T1_code/hollow/tasks/__init__.py
- T1_code/hollow/tasks/default.py
- T1_code/hollow/tasks/finetuning.py
- T1_code/hollow/tasks/sequence_default.py
- T1_code/hollow/train.py
- T1_code/hollow/utils/
- T1_code/hollow/utils/__init__.py
- T1_code/hollow/utils/checkpoint.py
- T1_code/hollow/utils/hooks.py
- T1_code/hollow/utils/init_fn.py
- T1_code/hollow/utils/numerics.py
- T1_code/hollow/utils/tuples.py
- T1_code/hollow/utils/utils.py
- T1_code/notebooks/
- T1_code/notebooks/analysis/
- T1_code/notebooks/analysis/variance_preserving.ipynb
- T1_code/notebooks/navier-stokes/
- T1_code/notebooks/navier-stokes/playground.ipynb
- T1_code/requirements.txt
- T1_code/run.py
- T1_code/scripts/
- T1_code/scripts/launch/
- T1_code/scripts/launch/dfp128/
- T1_code/scripts/launch/dfp128/unet.sh
- T1_code/scripts/launch/dfp128/t1.sh
- T1_code/scripts/launch/dfp128/fno2d.sh
- T1_code/scripts/launch/navier-stokes/
- T1_code/scripts/launch/navier-stokes/high_viscosity/
- T1_code/scripts/launch/navier-stokes/high_viscosity/run_fno_baselines.sh
- T1_code/scripts/launch/navier-stokes/high_viscosity/run_t1.sh
- T1_code/scripts/launch/navier-stokes/high_viscosity/run_t1u.sh
- T1_code/scripts/launch/navier-stokes/low_viscosity/
- T1_code/scripts/launch/navier-stokes/low_viscosity/run_fno_baselines.sh
- T1_code/scripts/launch/navier-stokes/low_viscosity/run_t1.sh
- T1_code/scripts/launch/navier-stokes/low_viscosity/run_t1u.sh
- T1_code/scripts/launch/scalarflow/
- T1_code/scripts/launch/scalarflow/fno.sh
- T1_code/scripts/launch/scalarflow/t1.sh
- T1_code/scripts/launch/scalarflow/t1u.sh
- T1_code/pip_freeze.txt
- T1_appendix.pdf
