# Supplementary material
Source: ML conference proceedings conference paper supplement (https://proceedings.neurips.cc/paper_files/paper/2022/hash/342339109d7d756ef7bb30cf672aec02-Abstract.html)
Supplement: Supplementary file 1 [file 342339109d7d756ef7bb30cf672aec02-Supplemental-Conference.zip › T1_code/analysis/latent_1d_benchmark_results.json]

{
  "vanilla": {
    "32": {
      "32": [
        0.001717821997590363
      ],
      "64": [
        0.0015206834068521857
      ],
      "128": [
        0.0017860299907624722
      ],
      "256": [
        0.0016254212008789183
      ],
      "512": [
        0.0019540242152288555
      ],
      "1024": [
        0.0018276228103786707
      ],
      "2048": [
        0.0021231190068647264
      ]
    },
    "64": {
      "32": [
        0.0017559595871716738
      ],
      "64": [
        0.00165200880728662
      ],
      "128": [
        0.001668017404153943
      ],
      "256": [
        0.0018009576015174389
      ],
      "512": [
        0.00185010579880327
      ],
      "1024": [
        0.002353400597348809
      ],
      "2048": [
        0.0036908703856170177
      ]
    },
    "128": {
      "32": [
        0.0015796852065250277
      ],
      "64": [
        0.0015870091971009969
      ],
      "128": [
        0.0017546857940033077
      ],
      "256": [
        0.0018125817878171802
      ],
      "512": [
        0.002307255403138697
      ],
      "1024": [
        0.004304325999692082
      ],
      "2048": [
        0.0069830335909500715
      ]
    },
    "256": {
      "32": [
        0.0018737429985776544
      ],
      "64": [
        0.0018357082037255168
      ],
      "128": [
        0.00207518320530653
      ],
      "256": [
        0.002360130404122174
      ],
      "512": [
        0.004182934598065913
      ],
      "1024": [
        0.008284603408537806
      ],
      "2048": [
        0.014099714206531644
      ]
    },
    "512": {
      "32": [
        0.0020856731804087757
      ],
      "64": [
        0.0022527198074385525
      ],
      "128": [
        0.003350302018225193
      ],
      "256": [
        0.005155897187069059
      ],
      "512": [
        0.009397000796161592
      ],
      "1024": [
        0.018164553004316984
      ],
      "2048": [
        0.031321696983650324
      ]
    },
    "1024": {
      "32": [
        0.004457034007646144
      ],
      "64": [
        0.005716139590367675
      ],
      "128": [
        0.008518968406133354
      ],
      "256": [
        0.012445404985919594
      ],
      "512": [
        0.022053253604099154
      ],
      "1024": [
        0.0418258470017463
      ],
      "2048": [
        0.07148779819253832
      ]
    },
    "2048": {
      "32": [
        0.015614770003594458
      ],
      "64": [
        0.01860941101331264
      ],
      "128": [
        0.024673892999999225
      ],
      "256": [
        0.03517754920758307
      ],
      "512": [
        0.057653548382222655
      ],
      "1024": [
        0.104081065999344
      ],
      "2048": [
        0.1789006780134514
      ]
    }
  },
  "latent": {
    "32": {
      "32": [
        0.0011335506103932857
      ],
      "64": [
        0.0011932512046769262
      ],
      "128": [
        0.0012736323988065124
      ],
      "256": [
        0.001324382796883583
      ],
      "512": [
        0.0012312757782638073
      ],
      "1024": [
        0.0013474043924361467
      ],
      "2048": [
        0.001329907588660717
      ]
    },
    "64": {
      "32": [
        0.001396403810940683
      ],
      "64": [
        0.0012549252016469837
      ],
      "128": [
        0.001485989009961486
      ],
      "256": [
        0.001240685605444014
      ],
      "512": [
        0.0014721621992066503
      ],
      "1024": [
        0.00135552859865129
      ],
      "2048": [
        0.001383565808646381
      ]
    },
    "128": {
      "32": [
        0.0012344116112217307
      ],
      "64": [
        0.0013515247963368892
      ],
      "128": [
        0.0015435425797477365
      ],
      "256": [
        0.0018141211941838265
      ],
      "512": [
        0.0014877584064379335
      ],
      "1024": [
        0.001762049808166921
      ],
      "2048": [
        0.001592114008963108
      ]
    },
    "256": {
      "32": [
        0.0013043284183368088
      ],
      "64": [
        0.001354113989509642
      ],
      "128": [
        0.001421049190685153
      ],
      "256": [
        0.001847392413765192
      ],
      "512": [
        0.0013904428109526635
      ],
      "1024": [
        0.0018510215915739537
      ],
      "2048": [
        0.0026206286158412693
      ]
    },
    "512": {
      "32": [
        0.001442073006182909
      ],
      "64": [
        0.0015638044103980064
      ],
      "128": [
        0.0013634664006531238
      ],
      "256": [
        0.0016992056043818593
      ],
      "512": [
        0.0021929441951215266
      ],
      "1024": [
        0.003461641795001924
      ],
      "2048": [
        0.005383899598382413
      ]
    },
    "1024": {
      "32": [
        0.003339323797263205
      ],
      "64": [
        0.003485177201218903
      ],
      "128": [
        0.0038334189914166926
      ],
      "256": [
        0.004388324194587767
      ],
      "512": [
        0.005592727195471525
      ],
      "1024": [
        0.008079964201897383
      ],
      "2048": [
        0.011905558197759092
      ]
    },
    "2048": {
      "32": [
        0.012189456797204911
      ],
      "64": [
        0.0125219508074224
      ],
      "128": [
        0.013260656199418009
      ],
      "256": [
        0.01431109879631549
      ],
      "512": [
        0.01690171759109944
      ],
      "1024": [
        0.021879651211202146
      ],
      "2048": [
        0.029785758582875133
      ]
    }
  },
  "latent_dct": {
    "32": {
      "32": [
        0.001128244586288929
      ],
      "64": [
        0.001230466808192432
      ],
      "128": [
        0.001210641209036112
      ],
      "256": [
        0.001326205604709685
      ],
      "512": [
        0.001212378591299057
      ],
      "1024": [
        0.0013820469845086335
      ],
      "2048": [
        0.0013382568024098874
      ]
    },
    "64": {
      "32": [
        0.0013744711875915527
      ],
      "64": [
        0.0016110187862068415
      ],
      "128": [
        0.0013938477961346508
      ],
      "256": [
        0.001255602389574051
      ],
      "512": [
        0.0021323235938325523
      ],
      "1024": [
        0.0014814058085903525
      ],
      "2048": [
        0.0013491410063579679
      ]
    },
    "128": {
      "32": [
        0.001368963997811079
      ],
      "64": [
        0.0012348275864496826
      ],
      "128": [
        0.0015667330008000135
      ],
      "256": [
        0.0014217738062143326
      ],
      "512": [
        0.0014896708074957133
      ],
      "1024": [
        0.0014559774193912745
      ],
      "2048": [
        0.0014537785900756717
      ]
    },
    "256": {
      "32": [
        0.0013907725922763347
      ],
      "64": [
        0.001346035790629685
      ],
      "128": [
        0.0013641719939187168
      ],
      "256": [
        0.0014972712146118284
      ],
      "512": [
        0.001464767218567431
      ],
      "1024": [
        0.00158451939933002
      ],
      "2048": [
        0.0026062326040118934
      ]
    },
    "512": {
      "32": [
        0.0015082224039360882
      ],
      "64": [
        0.0014059520093724132
      ],
      "128": [
        0.0013783622067421674
      ],
      "256": [
        0.0015621050028130413
      ],
      "512": [
        0.0021754119778051974
      ],
      "1024": [
        0.0034510458121076227
      ],
      "2048": [
        0.005373788392171263
      ]
    },
    "1024": {
      "32": [
        0.0033599304035305975
      ],
      "64": [
        0.003491441416554153
      ],
      "128": [
        0.0038367399945855142
      ],
      "256": [
        0.0043573140166699885
      ],
      "512": [
        0.005614130012691021
      ],
      "1024": [
        0.008082628017291427
      ],
      "2048": [
        0.011968453601002692
      ]
    },
    "2048": {
      "32": [
        0.012196304416283965
      ],
      "64": [
        0.012532462598755956
      ],
      "128": [
        0.013244341406971217
      ],
      "256": [
        0.014337646611966192
      ],
      "512": [
        0.017000007210299373
      ],
      "1024": [
        0.022046968596987425
      ],
      "2048": [
        0.029690985404886305
      ]
    }
  }
}
