# Supplementary material
Source: ML conference proceedings conference paper supplement (https://proceedings.neurips.cc/paper_files/paper/2022/hash/342339109d7d756ef7bb30cf672aec02-Abstract.html)
Supplement: Supplementary file 1 [file 342339109d7d756ef7bb30cf672aec02-Supplemental-Conference.zip › T1_code/analysis/latent_2d_benchmark_results.json]

{
  "vanilla": {
    "4": {
      "32": [
        0.002686386206187308
      ],
      "64": [
        0.003271568985655904
      ],
      "128": [
        0.007709208992309868
      ],
      "256": [
        0.024236867809668182
      ]
    },
    "8": {
      "32": [
        0.003085210407152772
      ],
      "64": [
        0.003889038204215467
      ],
      "128": [
        0.011684795003384351
      ],
      "256": [
        0.0451858791988343
      ]
    },
    "16": {
      "32": [
        0.003857028600759804
      ],
      "64": [
        0.005779295205138623
      ],
      "128": [
        0.020877191401086747
      ],
      "256": [
        0.08504889421164989
      ]
    },
    "32": {
      "32": [
        0.004179377015680075
      ],
      "64": [
        0.009722985001280904
      ],
      "128": [
        0.04481460421811789
      ],
      "256": [
        0.17298494419083
      ]
    },
    "64": {
      "32": [
        0.0061663438100367785
      ],
      "64": [
        0.019146857201121747
      ],
      "128": [
        0.08872471319045871
      ],
      "256": [
        0.3324652750045061
      ]
    }
  },
  "latent": {
    "4": {
      "32": [
        0.0017040292033925653
      ],
      "64": [
        0.0017209097975865006
      ],
      "128": [
        0.001856327592395246
      ],
      "256": [
        0.0017837414052337408
      ]
    },
    "8": {
      "32": [
        0.0017361999955028296
      ],
      "64": [
        0.0017702831886708737
      ],
      "128": [
        0.001820758800022304
      ],
      "256": [
        0.0018212856026366352
      ]
    },
    "16": {
      "32": [
        0.001738479221239686
      ],
      "64": [
        0.0018075942061841488
      ],
      "128": [
        0.0018464409979060293
      ],
      "256": [
        0.003495202586054802
      ]
    },
    "32": {
      "32": [
        0.001792507618665695
      ],
      "64": [
        0.001802554400637746
      ],
      "128": [
        0.0017492179991677403
      ],
      "256": [
        0.001796934800222516
      ]
    },
    "64": {
      "32": [
        0.0019213882042095065
      ],
      "64": [
        0.001795692602172494
      ],
      "128": [
        0.0017455482156947255
      ],
      "256": [
        0.0018255389994010329
      ]
    }
  },
  "latent_dct": {
    "4": {
      "32": [
        0.00174423239659518
      ],
      "64": [
        0.001725063193589449
      ],
      "128": [
        0.0017703442135825753
      ],
      "256": [
        0.0017775428015738726
      ]
    },
    "8": {
      "32": [
        0.0017149366205558181
      ],
      "64": [
        0.0017772254068404436
      ],
      "128": [
        0.0018216636031866073
      ],
      "256": [
        0.0017997482093051076
      ]
    },
    "16": {
      "32": [
        0.0017263717949390412
      ],
      "64": [
        0.0018285384168848396
      ],
      "128": [
        0.0020037571899592876
      ],
      "256": [
        0.0018638312118127941
      ]
    },
    "32": {
      "32": [
        0.0017553979996591806
      ],
      "64": [
        0.0017909059999510646
      ],
      "128": [
        0.0017181865870952607
      ],
      "256": [
        0.0018096754094585777
      ]
    },
    "64": {
      "32": [
        0.0017921091988682748
      ],
      "64": [
        0.001765956007875502
      ],
      "128": [
        0.0018258176045492292
      ],
      "256": [
        0.001826974400319159
      ]
    }
  }
}
