# Supplementary material
Source: ML conference proceedings conference paper supplement (https://proceedings.neurips.cc/paper_files/paper/2022/hash/342339109d7d756ef7bb30cf672aec02-Abstract.html)
Supplement: Supplementary file 1 [file 342339109d7d756ef7bb30cf672aec02-Supplemental-Conference.zip › T1_code/configs/callbacks/default.yaml]

# rich_progress_bar:
#   _target_: pytorch_lightning.callbacks.RichProgressBar

rich_model_summary:
  _target_: pytorch_lightning.callbacks.RichModelSummary

model_checkpoint:
  _target_: hollow.callbacks.model_checkpoint.ModelCheckpointMine
  monitor: "val/loss" # name of the logged metric which determines when model is improving
  mode: "min" # can be "max" or "min"
  save_top_k: 1 # save k best models (determined by above metric)
  save_last: True # additionally always save model from last epoch
  verbose: False
  dirpath: ${oc.env:CHECKPOINT_DIR,checkpoints}/${oc.select:name,''}
  filename: "epoch_{epoch:03d}"
  auto_insert_metric_name: False

early_stopping:
  _target_: pytorch_lightning.callbacks.EarlyStopping
  monitor: "val/loss" # name of the logged metric which determines when model is improving
  mode: "min" # can be "max" or "min"
  patience: 100 # how many epochs of not improving until training stops
  min_delta: 0 # minimum change in the monitored metric needed to qualify as an improvement

learning_rate_monitor:
  _target_: pytorch_lightning.callbacks.LearningRateMonitor
  logging_interval: epoch

speed_monitor:
  _target_: hollow.callbacks.speed_monitor.SpeedMonitor
  intra_step_time: True
  inter_step_time: True
  epoch_time: True

params_log:
  _target_: hollow.callbacks.params_log.ParamsLog
  total_params_log: True
  trainable_params_log: True
  non_trainable_params_log: True

# gpu_affinity:
#   _target_: hollow.callbacks.gpu_affinity.GpuAffinity
