# Supplementary material
Source: ML conference proceedings conference paper supplement (https://proceedings.neurips.cc/paper_files/paper/2022/hash/342339109d7d756ef7bb30cf672aec02-Abstract.html)
Supplement: Supplementary file 1 [file 342339109d7d756ef7bb30cf672aec02-Supplemental-Conference.zip › T1_code/configs/callbacks/log_recons_metrics.yaml]

log_recons_metrics:
  _target_: hollow.callbacks.wandb_callbacks.LogReconstructionMetrics
