# Supplementary material
Source: ML conference proceedings conference paper supplement (https://proceedings.neurips.cc/paper_files/paper/2022/hash/342339109d7d756ef7bb30cf672aec02-Abstract.html)
Supplement: Supplementary file 1 [file 342339109d7d756ef7bb30cf672aec02-Supplemental-Conference.zip › T1_code/configs/datamodule/navier_stokes.yaml]

_target_: hollow.datamodules.basic_pde.NavierStokes
data_dir: ${oc.env:DATA_DIR,${data_dir}}/  # data_dir is specified in config.yaml
ntrain: 4000
target_time: 40
shuffle: True
__train_len: ${.ntrain}
