# Supplementary material
Source: ML conference proceedings conference paper supplement (https://proceedings.neurips.cc/paper_files/paper/2022/hash/342339109d7d756ef7bb30cf672aec02-Abstract.html)
Supplement: Supplementary file 1 [file 342339109d7d756ef7bb30cf672aec02-Supplemental-Conference.zip › T1_code/configs/datamodule/scalarflow.yaml]

_target_: hollow.datamodules.scalarflow.ScalarFlow
data_dir: /datasets/scalarflow/m1521788/scalarflow_preprocessed # NOTE: manually for now ${oc.env:DATA_DIR,${data_dir}}/scalarflow_images/  # data_dir is specified in config.yaml
shuffle: True
