# Supplementary material
Source: ML conference proceedings conference paper supplement (https://proceedings.neurips.cc/paper_files/paper/2022/hash/342339109d7d756ef7bb30cf672aec02-Abstract.html)
Supplement: Supplementary file 1 [file 342339109d7d756ef7bb30cf672aec02-Supplemental-Conference.zip › T1_code/configs/experiment/dfp128/ffno.yaml]

# @package _global_
defaults:
  - override /trainer: default 
  - override /model: ffno
  - override /datamodule: dfpfull_low_memory
  - override /callbacks: [log_recons_metrics, default]
  - override /metrics: [relativel1]
  - override /logger: wandb
  - override /task: default

seed: 420

model:
  modes: 24
  width: 64
  n_layers: 12 
  input_dim: 3 


trainer:
  accelerator: gpu
  devices: 1
  num_nodes: 1
  max_epochs: 400

datamodule:
  data_dir: /data
  dataset_size: 2000 # max size
  batch_size: 64
  
train:
  optimizer:
    _target_: torch.optim.AdamW
    lr: 1e-3
    weight_decay: 1e-4
  scheduler:
    _target_: torch.optim.lr_scheduler.StepLR
    step_size: 50
    gamma: 0.6
  scheduler_interval: epoch
  loss_fn:
    _target_: hollow.losses.relative.RelativeL2

callbacks:
  early_stopping: null
