# Supplementary material
Source: ML conference proceedings conference paper supplement (https://proceedings.neurips.cc/paper_files/paper/2022/hash/342339109d7d756ef7bb30cf672aec02-Abstract.html)
Supplement: Supplementary file 1 [file 342339109d7d756ef7bb30cf672aec02-Supplemental-Conference.zip › T1_code/configs/experiment/dfp128/vitdyn-fno.yaml]

# @package _global_
defaults:
  - override /trainer: default # choose trainer from 'configs/trainer/'
  - override /model: vitdyn-fno
  - override /datamodule: dfpfull
  - override /callbacks: [default, log_recons_metrics, logact_vitdyn]
  - override /metrics: [relativel1]
  - override /logger: wandb
  - override /task: finetuning

seed: 420

model:
  pretrained: False
  modes1: 12
  modes2: ${.modes1}
  width: 32
  padding: 0
  in_channels : 3
  out_channels : 3

trainer:
  accelerator: gpu
  devices: 1
  num_nodes: 1
  max_epochs: 300

datamodule:
  dataset_size: 30000 # max size
  batch_size: 64
  res : 224 
  preprocess : True
  
train:
  stem_optimizer:
    _target_: torch.optim.AdamW
    lr: 6e-4
    weight_decay: 1e-3
  stem_scheduler:
    _target_: torch.optim.lr_scheduler.StepLR
    step_size: 50
    gamma: 0.6
  post_stem_optimizer:
    _target_: torch.optim.AdamW
    lr: 1e-3
    weight_decay: 1e-4
  post_stem_scheduler:
    _target_: torch.optim.lr_scheduler.StepLR
    step_size: 50
    gamma: 0.6
  scheduler_interval: epoch
  loss_fn:
    _target_: hollow.losses.relative.RelativeL2
