# Supplementary material
Source: ML conference proceedings conference paper supplement (https://proceedings.neurips.cc/paper_files/paper/2022/hash/342339109d7d756ef7bb30cf672aec02-Abstract.html)
Supplement: Supplementary file 1 [file 342339109d7d756ef7bb30cf672aec02-Supplemental-Conference.zip › T1_code/configs/experiment/navier-stokes/t1.yaml]

# @package _global_
defaults:
  - override /trainer: default # choose trainer from 'configs/trainer/'
  - override /model: t1_2d
  - override /datamodule: navier_stokes
  - override /optimizer: adamw
  - override /scheduler: step
  - override /callbacks: default
  - override /metrics: [mse]
  - override /logger: wandb

seed: 4444

model:
  modes1: 24
  modes2: 24
  width: 48
  nlayers: 8 
  padding: 0
  keep_high: False
  perform_inverse: False
  residual: True
  weight_init: 2
  act: "gelu"
  signal_resolution: [64, 64]
  transform: "dct"

trainer:
  accelerator: gpu
  devices: 1
  num_nodes: 1
  max_epochs: 500

datamodule:
  batch_size: 64
  subsampling_rate: 1
  ntest: 200
  ntrain: 1000
  target_time: 50
  viscosity: 1e-3
  data_dir: /your/path/here

train:
  optimizer:
    lr:  1e-3
    weight_decay: 1e-4
  scheduler:
    step_size: 100
    gamma: 0.5
  scheduler_interval: epoch
  loss_fn: 
    _target_: hollow.losses.relative_l2.RelativeL2DCT

callbacks:
  model_checkpoint: null
  early_stopping: null

logger:
  wandb:
    project: navier-stokes
    name: T1
