# Supplementary material
Source: ML conference proceedings conference paper supplement (https://proceedings.neurips.cc/paper_files/paper/2022/hash/342339109d7d756ef7bb30cf672aec02-Abstract.html)
Supplement: Supplementary file 1 [file 342339109d7d756ef7bb30cf672aec02-Supplemental-Conference.zip › T1_code/configs/logger/wandb.yaml]

# https://wandb.ai

wandb:
  _target_: pytorch_lightning.loggers.wandb.WandbLogger
  project: fno-dfpfull
  name: ${name}
  save_dir: "."
  mode: online # set offline to store all logs only locally
  id: ${oc.select:name} # pass correct id to resume experiment!
  # entity: ""  # set to name of your wandb team or just remove it
  log_model: False
  prefix: ""
  job_type: "train"
  group: ""
  tags: []
  entity: "anonymous-research"
