# Supplementary material
Source: ML conference proceedings conference paper supplement (https://proceedings.neurips.cc/paper_files/paper/2022/hash/342339109d7d756ef7bb30cf672aec02-Abstract.html)
Supplement: Supplementary file 1 [file 342339109d7d756ef7bb30cf672aec02-Supplemental-Conference.zip › T1_code/configs/mode/default.yaml]

# @package _global_

# default running mode

default_mode: True

hydra:
  # default output paths for all file logs
  run:
    dir: ${oc.env:RESULT_DIR,${work_dir}/logs}/runs/${now:%Y-%m-%d}/${now:%H-%M-%S}
  sweep:
    dir: ${oc.env:RESULT_DIR,${work_dir}/logs}/multiruns/${now:%Y-%m-%d_%H-%M-%S}
    subdir: ${hydra.job.num}
