# Supplementary material
Source: ML conference proceedings conference paper supplement (https://proceedings.neurips.cc/paper_files/paper/2022/hash/342339109d7d756ef7bb30cf672aec02-Abstract.html)
Supplement: Supplementary file 1 [file 342339109d7d756ef7bb30cf672aec02-Supplemental-Conference.zip › T1_code/configs/trainer/default.yaml]

_target_: pytorch_lightning.Trainer

# set `gpu` to train on GPU, null to train on CPU only
accelerator: null

min_epochs: 1
max_epochs: 1000

progress_bar_refresh_rate: 5
