# Supplementary material
Source: ML conference proceedings conference paper supplement (https://proceedings.neurips.cc/paper_files/paper/2022/hash/342339109d7d756ef7bb30cf672aec02-Abstract.html)
Supplement: Supplementary file 1 [file 342339109d7d756ef7bb30cf672aec02-Supplemental-Conference.zip › T1_code/hollow/callbacks/gpu_affinity.py]

import math
import os

import pynvml

pynvml.nvmlInit()


def systemGetDriverVersion():
    return pynvml.nvmlSystemGetDriverVersion()


def deviceGetCount():
    return pynvml.nvmlDeviceGetCount()


class device:
    # assume nvml returns list of 64 bit ints
    _nvml_affinity_elements = math.ceil(os.cpu_count() / 64)

    def __init__(self, device_idx):
        super().__init__()
        self.handle = pynvml.nvmlDeviceGetHandleByIndex(device_idx)

    def getName(self):
        return pynvml.nvmlDeviceGetName(self.handle)

    def getCpuAffinity(self):
        affinity_string = ''
        for j in pynvml.nvmlDeviceGetCpuAffinity(
            self.handle, device._nvml_affinity_elements
        ):
            # assume nvml returns list of 64 bit ints
            affinity_string = '{:064b}'.format(j) + affinity_string
        affinity_list = [int(x) for x in affinity_string]
        affinity_list.reverse()  # so core 0 is in 0th element of list

        return [i for i, e in enumerate(affinity_list) if e != 0]


def set_affinity(gpu_id=None):
    if gpu_id is None:
        gpu_id = int(os.getenv('LOCAL_RANK', 0))

    dev = device(gpu_id)
    os.sched_setaffinity(0, dev.getCpuAffinity())

    # list of ints representing the logical cores this process is now affinitied with
    return os.sched_getaffinity(0)
