# Supplementary material
Source: ML conference proceedings conference paper supplement (https://proceedings.neurips.cc/paper_files/paper/2022/hash/342339109d7d756ef7bb30cf672aec02-Abstract.html)
Supplement: Supplementary file 1 [file 342339109d7d756ef7bb30cf672aec02-Supplemental-Conference.zip › T1_code/hollow/models/ffno.py]

import torch
import torch.nn as nn
from einops import rearrange

import copy
import logging
import math

import torch.nn as nn
from torch.nn.utils import weight_norm
from torch.nn.utils.weight_norm import WeightNorm

logger = logging.getLogger(__name__)


class GehringLinear(nn.Linear):
    """A linear layer with Gehring initialization and weight normalization."""

    def __init__(self, in_features, out_features, dropout=0, bias=True,
                 weight_norm=True):
        self.dropout = dropout
        self.weight_norm = weight_norm
        super().__init__(in_features, out_features, bias)

    def reset_parameters(self):
        # One problem with initialization from the uniform distribution is that
        # the distribution of the outputs has a variance that grows with the
        # number of inputs. It turns out that we can normalize the variance of
        # each neuron’s output to 1 by scaling its weight vector by the square
        # root of its fan-in (i.e. its number of inputs). Dropout further
        # increases the variance of each input, so we need to scale down std.
        # See A.3. in Gehring et al (2017): https://arxiv.org/pdf/1705.03122.
        std = math.sqrt((1 - self.dropout) / self.in_features)
        self.weight.data.normal_(mean=0, std=std)
        if self.bias is not None:
            self.bias.data.fill_(0)

        # Weight normalization is a reparameterization that decouples the
        # magnitude of a weight tensor from its direction. See Salimans and
        # Kingma (2016): https://arxiv.org/abs/1602.07868.
        if self.weight_norm:
            nn.utils.weight_norm(self)


class WNLinear(nn.Linear):
    def __init__(self, in_features: int, out_features: int, bias: bool = True, device=None, dtype=None, wnorm=False):
        super().__init__(in_features=in_features,
                         out_features=out_features,
                         bias=bias,
                         device=device,
                         dtype=dtype)
        if wnorm:
            weight_norm(self)

        self._fix_weight_norm_deepcopy()

    def _fix_weight_norm_deepcopy(self):
        # Fix bug where deepcopy doesn't work with weightnorm.
        # Taken from https://github.com/pytorch/pytorch/issues/28594#issuecomment-679534348
        orig_deepcopy = getattr(self, '__deepcopy__', None)

        def __deepcopy__(self, memo):
            # save and delete all weightnorm weights on self
            weights = {}
            for hook in self._forward_pre_hooks.values():
                if isinstance(hook, WeightNorm):
                    weights[hook.name] = getattr(self, hook.name)
                    delattr(self, hook.name)
            # remove this deepcopy method, restoring the object's original one if necessary
            __deepcopy__ = self.__deepcopy__
            if orig_deepcopy:
                self.__deepcopy__ = orig_deepcopy
            else:
                del self.__deepcopy__
            # actually do the copy
            result = copy.deepcopy(self)
            # restore weights and method on self
            for name, value in weights.items():
                setattr(self, name, value)
            self.__deepcopy__ = __deepcopy__
            return result
        # bind __deepcopy__ to the weightnorm'd layer
        self.__deepcopy__ = __deepcopy__.__get__(self, self.__class__)


class FeedForward(nn.Module):
    def __init__(self, dim, factor, ff_weight_norm, n_layers, layer_norm, dropout):
        super().__init__()
        self.layers = nn.ModuleList([])
        for i in range(n_layers):
            in_dim = dim if i == 0 else dim * factor
            out_dim = dim if i == n_layers - 1 else dim * factor
            self.layers.append(nn.Sequential(
                WNLinear(in_dim, out_dim, wnorm=ff_weight_norm),
                nn.Dropout(dropout),
                nn.ReLU(inplace=True) if i < n_layers - 1 else nn.Identity(),
                nn.LayerNorm(out_dim) if layer_norm and i == n_layers -
                1 else nn.Identity(),
            ))

    def forward(self, x):
        for layer in self.layers:
            x = layer(x)
        return x


class DFTFFNO2d(nn.Module):
    def __init__(self, in_dim, out_dim, n_modes, forecast_ff, backcast_ff,
                 fourier_weight, factor, norm_locs, group_width, ff_weight_norm,
                 n_ff_layers, layer_norm, use_fork, dropout, mode):
        super().__init__()
        self.in_dim = in_dim
        self.out_dim = out_dim
        self.n_modes = n_modes
        self.norm_locs = norm_locs
        self.group_width = group_width
        self.mode = mode
        self.use_fork = use_fork

        self.fourier_weight = fourier_weight
        # Can't use complex type yet. See https://github.com/pytorch/pytorch/issues/59998
        if not self.fourier_weight:
            self.fourier_weight = nn.ParameterList([])
            for _ in range(2):
                weight = torch.FloatTensor(in_dim, out_dim, n_modes, 2)
                param = nn.Parameter(weight)
                nn.init.xavier_normal_(param)
                self.fourier_weight.append(param)

        if use_fork:
            self.forecast_ff = forecast_ff
            if not self.forecast_ff:
                self.forecast_ff = FeedForward(
                    out_dim, factor, ff_weight_norm, n_ff_layers, layer_norm, dropout)

        self.backcast_ff = backcast_ff
        if not self.backcast_ff:
            self.backcast_ff = FeedForward(
                out_dim, factor, ff_weight_norm, n_ff_layers, layer_norm, dropout)

    def forward(self, x):
        # x.shape == [batch_size, grid_size, grid_size, in_dim]
        if self.mode != 'no-fourier':
            x = self.forward_fourier(x)

        b = self.backcast_ff(x)
        f = self.forecast_ff(x) if self.use_fork else None
        return b, f

    def forward_fourier(self, x):
        x = rearrange(x, 'b m n i -> b i m n')
        # x.shape == [batch_size, in_dim, grid_size, grid_size]

        B, I, M, N = x.shape

        # # # Dimesion Y # # #

        x_fty = torch.fft.rfft(x, dim=-1, norm='ortho')
        # x_ft.shape == [batch_size, in_dim, grid_size, grid_size // 2 + 1]

        out_ft = x_fty.new_zeros(B, I, N, M // 2 + 1)
        # out_ft.shape == [batch_size, in_dim, grid_size, grid_size // 2 + 1, 2]

        if self.mode == 'full':
            out_ft[:, :, :, :self.n_modes] = torch.einsum(
                "bixy,ioy->boxy",
                x_fty[:, :, :, :self.n_modes],
                torch.view_as_complex(self.fourier_weight[0]))
        elif self.mode == 'low-pass':
            out_ft[:, :, :, :self.n_modes] = x_fty[:, :, :, :self.n_modes]

        xy = torch.fft.irfft(out_ft, n=N, dim=-1, norm='ortho')
        # x.shape == [batch_size, in_dim, grid_size, grid_size]

        # # # Dimesion X # # #
        x_ftx = torch.fft.rfft(x, dim=-2, norm='ortho')
        # x_ft.shape == [batch_size, in_dim, grid_size // 2 + 1, grid_size]

        out_ft = x_ftx.new_zeros(B, I, N // 2 + 1, M)
        # out_ft.shape == [batch_size, in_dim, grid_size // 2 + 1, grid_size, 2]

        if self.mode == 'full':
            out_ft[:, :, :self.n_modes, :] = torch.einsum(
                "bixy,iox->boxy",
                x_ftx[:, :, :self.n_modes, :],
                torch.view_as_complex(self.fourier_weight[1]))
        elif self.mode == 'low-pass':
            out_ft[:, :, :self.n_modes, :] = x_ftx[:, :, :self.n_modes, :]

        xx = torch.fft.irfft(out_ft, n=M, dim=-2, norm='ortho')
        # x.shape == [batch_size, in_dim, grid_size, grid_size]

        # # Combining Dimensions # #
        #print(xx.mean(), xy.mean())
        x = xx + xy

        x = rearrange(x, 'b i m n -> b m n i')
        # x.shape == [batch_size, grid_size, grid_size, out_dim]

        return x


class FNOFactorized2DBlock(nn.Module):
    def __init__(self, modes, width, input_dim=12, dropout=0.0, in_dropout=0.0,
                 n_layers=4, linear_out: bool = False, share_weight: bool = False,
                 avg_outs=False, next_input='subtract', share_fork=False, factor=2,
                 norm_locs=[], group_width=16, ff_weight_norm=False, n_ff_layers=2,
                 gain=1, layer_norm=False, use_fork=False, mode='full'):
        super().__init__()
        self.modes = modes
        self.width = width
        self.input_dim = input_dim
        self.in_proj = WNLinear(input_dim, self.width, wnorm=ff_weight_norm)
        self.drop = nn.Dropout(in_dropout)
        self.next_input = next_input
        self.avg_outs = avg_outs
        self.n_layers = n_layers
        self.norm_locs = norm_locs
        self.use_fork = use_fork

        self.forecast_ff = self.backcast_ff = None
        if share_fork:
            if use_fork:
                self.forecast_ff = FeedForward(
                    width, factor, ff_weight_norm, n_ff_layers, layer_norm, dropout)
            self.backcast_ff = FeedForward(
                width, factor, ff_weight_norm, n_ff_layers, layer_norm, dropout)

        self.fourier_weight = None
        if share_weight:
            self.fourier_weight = nn.ParameterList([])
            for _ in range(2):
                weight = torch.FloatTensor(width, width, modes, 2)
                param = nn.Parameter(weight)
                nn.init.xavier_normal_(param, gain=gain)
                self.fourier_weight.append(param)

        self.spectral_layers = nn.ModuleList([])
        for _ in range(n_layers):
            self.spectral_layers.append(DFTFFNO2d(in_dim=width,
                                                    out_dim=width,
                                                    n_modes=modes,
                                                    forecast_ff=self.forecast_ff,
                                                    backcast_ff=self.backcast_ff,
                                                    fourier_weight=self.fourier_weight,
                                                    factor=factor,
                                                    norm_locs=norm_locs,
                                                    group_width=group_width,
                                                    ff_weight_norm=ff_weight_norm,
                                                    n_ff_layers=n_ff_layers,
                                                    layer_norm=layer_norm,
                                                    use_fork=use_fork,
                                                    dropout=dropout,
                                                    mode=mode))

        self.out = nn.Sequential(
            WNLinear(self.width, 128, wnorm=ff_weight_norm),
            WNLinear(128, 1, wnorm=ff_weight_norm))

    def forward(self, x, **kwargs):
        # x.shape == [n_batches, *dim_sizes, input_size]
        forecast = 0
        x = rearrange(x, 'b x y -> b x y 1')

        x = self.in_proj(x)
        x = self.drop(x)
        forecast_list = []
        for i in range(self.n_layers):
            layer = self.spectral_layers[i]
            b, f = layer(x)

            if self.use_fork:
                f_out = self.out(f)
                forecast = forecast + f_out
                forecast_list.append(f_out)

            if self.next_input == 'subtract':
                x = x - b
            elif self.next_input == 'add':
                x = x + b

        if not self.use_fork:
            forecast = self.out(b)
        if self.avg_outs:
            forecast = forecast / len(self.spectral_layers)

        return forecast.squeeze(-1)


if __name__ == "__main__":
    m = FNOFactorized2DBlock(
        24, 48, 1, n_layers=24
    )
    x = torch.randn(4, 64, 64)
    y = m(x)
    print(y.shape)
    print(sum([p.numel() for p in m.parameters()]))
    
