# Supplementary material
Source: ML conference proceedings conference paper supplement (https://proceedings.neurips.cc/paper_files/paper/2022/hash/342339109d7d756ef7bb30cf672aec02-Abstract.html)
Supplement: Supplementary file 1 [file 342339109d7d756ef7bb30cf672aec02-Supplemental-Conference.zip › T1_code/hollow/models/modules/seq_common.py]

import math

import torch
import torch.nn as nn

import hydra

from einops import reduce, rearrange

from hollow.utils.tuples import to_2tuple


def pooling(x, pooling_mode='CLS', key_padding_mask=None, batch_first=True):
    if pooling_mode not in ['MEAN', 'SUM', 'CLS', 'FLATTEN']:
        raise NotImplementedError(f'pooling_mode must be MEAN, SUM, CLS, FLATTEN')
    if pooling_mode in ['MEAN', 'SUM']:
        if key_padding_mask is not None:
            mask = rearrange(~key_padding_mask.bool_matrix,
                             'b s -> b s 1' if batch_first else 'b s -> s b 1')
            x = x.masked_fill(mask, 0)
        return reduce(x, 'b s ... -> b ...' if batch_first else 's b ... -> b ...',
                      pooling_mode.lower())
    elif pooling_mode == 'CLS':
        return x[:, 0] if batch_first else x[0]
    elif pooling_mode == 'FLATTEN':
        return rearrange(x, 'b ... -> b (...)' if batch_first else 's b ... -> b (s ...)')


class ClassificationHeadLinear(nn.Module):
    """Head for sentence-level classification tasks."""

    def __init__(self, d_model, num_classes, pooling_mode='MEAN',
                 batch_first=False, **kwargs):
        super().__init__()
        assert pooling_mode in ['MEAN', 'SUM', 'CLS', 'FLATTEN'], 'pooling_mode not supported'
        self.pooling_mode = pooling_mode
        self.batch_first = batch_first
        self.out_proj = nn.Linear(d_model, num_classes)

    def forward(self, hidden_states, key_padding_mask=None, **kwargs):
        """
            hidden_states: (B, S, D) if batch_first else (S, B, D)
        """
        hidden_states = pooling(hidden_states, pooling_mode=self.pooling_mode,
                                key_padding_mask=key_padding_mask, batch_first=self.batch_first)
        hidden_states = self.out_proj(hidden_states)
        return hidden_states


# Adapted from https://github.com/huggingface/transformers/blob/master/src/transformers/models/reformer/modeling_reformer.py
class ClassificationHead(nn.Module):
    """Head for sentence-level classification tasks."""

    def __init__(self, d_model, d_inner, num_classes, dropout=0.0, pooling_mode='MEAN',
                 batch_first=False):
        super().__init__()
        assert pooling_mode in ['MEAN', 'SUM', 'CLS', 'FLATTEN'], 'pooling_mode not supported'
        self.pooling_mode = pooling_mode
        self.batch_first = batch_first
        self.dense = nn.Linear(d_model, d_inner)
        self.dropout = nn.Dropout(dropout)
        self.out_proj = nn.Linear(d_inner, num_classes)

    def forward(self, hidden_states, key_padding_mask=None, **kwargs):
        """
            hidden_states: (B, S, D) if batch_first else (S, B, D)
        """
        hidden_states = pooling(hidden_states, pooling_mode=self.pooling_mode,
                                key_padding_mask=key_padding_mask, batch_first=self.batch_first)
        hidden_states = self.dropout(hidden_states)
        hidden_states = self.dense(hidden_states)
        # Huggingface uses tanh instead of relu
        hidden_states = torch.relu(hidden_states)
        hidden_states = self.dropout(hidden_states)
        hidden_states = self.out_proj(hidden_states)
        return hidden_states


class ClassificationHeadDual(nn.Module):
    """Head for sentence-level classification tasks."""

    def __init__(self, d_model, d_inner, num_classes, dropout=0.0, pooling_mode='MEAN',
                 batch_first=False, interaction='NLI'):
        super().__init__()
        assert pooling_mode in ['MEAN', 'SUM', 'CLS'], 'pooling_mode not supported'
        assert interaction in [None, 'NLI'], 'interaction not supported'
        self.pooling_mode = pooling_mode
        self.batch_first = batch_first
        self.interaction = interaction
        self.dense = nn.Linear(d_model * (4 if self.interaction == 'NLI' else 2), d_inner)
        self.dropout = nn.Dropout(dropout)
        self.out_proj = nn.Linear(d_inner, num_classes)

    def forward(self, hidden_states1, hidden_states2,
                key_padding_mask1=None, key_padding_mask2=None, **kwargs):
        """
            hidden_states: (B, S, D) if batch_first else (S, B, D)
        """
        x1 = pooling(hidden_states1, pooling_mode=self.pooling_mode,
                     key_padding_mask=key_padding_mask1, batch_first=self.batch_first)
        x2 = pooling(hidden_states2, pooling_mode=self.pooling_mode,
                     key_padding_mask=key_padding_mask2, batch_first=self.batch_first)
        hidden_states = (torch.cat([x1, x2, x1 * x2, x1 - x2], dim=-1) if self.interaction == 'NLI'
                         else torch.cat([x1, x2], dim=-1))
        hidden_states = self.dropout(hidden_states)
        hidden_states = self.dense(hidden_states)
        # Huggingface uses tanh instead of relu
        hidden_states = torch.relu(hidden_states)
        hidden_states = self.dropout(hidden_states)
        hidden_states = self.out_proj(hidden_states)
        return hidden_states


def sinusoidal_init_(tensor):
    """
        tensor: (max_len, d_model)
    """
    max_len, d_model = tensor.shape
    position = rearrange(torch.arange(0.0, max_len), 's -> s 1')
    div_term = torch.exp(-math.log(10000.0) * torch.arange(0.0, d_model, 2.0) / d_model)
    tensor[:, 0::2] = torch.sin(position * div_term)
    tensor[:, 1::2] = torch.cos(position * div_term)
    return tensor


# Adapted from https://github.com/pytorch/examples/blob/master/word_language_model/model.py
class PositionalEncoding(nn.Module):
    r"""Inject some information about the relative or absolute position of the tokens
        in the sequence. The positional encodings have the same dimension as
        the embeddings, so that the two can be summed. Here, we use sine and cosine
        functions of different frequencies.
    .. math::
        \text{PosEncoder}(pos, 2i) = sin(pos/10000^(2i/d_model))
        \text{PosEncoder}(pos, 2i+1) = cos(pos/10000^(2i/d_model))
        \text{where pos is the word position and i is the embed idx)
    Args:
        d_model: the embed dim (required).
        dropout: the dropout value (default=0.1).
        max_len: the max. length of the incoming sequence (default=5000).
    Examples:
        >>> pos_encoder = PositionalEncoding(d_model)
    """

    def __init__(self, d_model, dropout=0.1, max_len=5000, batch_first=False, initializer=None):
        super().__init__()
        self.batch_first = batch_first
        self.dropout = nn.Dropout(p=dropout)
        pe = torch.empty(max_len, d_model)
        if initializer is None:
            sinusoidal_init_(pe)
            pe = rearrange(pe, 's d -> 1 s d' if self.batch_first else 's d -> s 1 d')
            self.register_buffer('pe', pe)
        else:
            hydra.utils.call(initializer, pe)
            pe = rearrange(pe, 's d -> 1 s d' if self.batch_first else 's d -> s 1 d')
            self.pe = nn.Parameter(pe)

    def forward(self, x):
        r"""Inputs of forward function
        Args:
            x: the sequence fed to the positional encoder model (required).
        Shape:
            x: [sequence length, batch size, embed dim] if not batch_first else [B, S, D]
            output: [sequence length, batch size, embed dim] if not batch_first else [B, S, D]
        Examples:
            >>> output = pos_encoder(x)
        """
        x = x + (self.pe[:, :x.size(1)] if self.batch_first else self.pe[:x.size(0)])
        return self.dropout(x)


# Adapted from https://github.com/rwightman/pytorch-image-models/blob/master/timm/models/layers/mlp.py
class Mlp(nn.Module):
    """ MLP as used in Vision Transformer, MLP-Mixer and related networks
    """
    def __init__(self, in_features, hidden_features=None, out_features=None, act_layer=nn.GELU,
                 act_fn=None, drop=0., device=None, dtype=None):
        """TD [2021-10-27] act_fn takes precedence over act_layer if set.
        This is to support Pytorch 1.10 Transformer interface that construct the activation
        *function*, not the activation *layer*.
        """
        factory_kwargs = {'device': device, 'dtype': dtype}
        super().__init__()
        out_features = out_features or in_features
        hidden_features = hidden_features or in_features
        drop_probs = to_2tuple(drop)
        self.fc1 = nn.Linear(in_features, hidden_features, **factory_kwargs)
        self.act = act_layer() if act_fn is None else act_fn
        self.drop1 = nn.Dropout(drop_probs[0])
        self.fc2 = nn.Linear(hidden_features, out_features, **factory_kwargs)
        self.drop2 = nn.Dropout(drop_probs[1])

    def forward(self, x):
        x = self.fc1(x)
        x = self.act(x)
        x = self.drop1(x)
        x = self.fc2(x)
        x = self.drop2(x)
        return x


class GluMlp(nn.Module):
    """ MLP w/ GLU style gating
    See: https://arxiv.org/abs/1612.08083, https://arxiv.org/abs/2002.05202
    """
    def __init__(self, in_features, hidden_features=None, out_features=None, act_layer=nn.Sigmoid, drop=0.):
        super().__init__()
        out_features = out_features or in_features
        hidden_features = hidden_features or in_features
        assert hidden_features % 2 == 0
        self.fc1 = nn.Linear(in_features, hidden_features)
        self.act = act_layer()
        self.fc2 = nn.Linear(hidden_features // 2, out_features)
        self.drop = nn.Dropout(drop)

    def init_weights(self):
        # override init of fc1 w/ gate portion set to weight near zero, bias=1
        fc1_mid = self.fc1.bias.shape[0] // 2
        nn.init.ones_(self.fc1.bias[fc1_mid:])
        nn.init.normal_(self.fc1.weight[fc1_mid:], std=1e-6)

    def forward(self, x):
        x = self.fc1(x)
        x, gates = x.chunk(2, dim=-1)
        x = x * self.act(gates)
        x = self.drop(x)
        x = self.fc2(x)
        x = self.drop(x)
        return x


class GatedMlp(nn.Module):
    """ MLP as used in gMLP
    """
    def __init__(self, in_features, hidden_features=None, out_features=None, act_layer=nn.GELU,
                 gate_layer=None, drop=0.):
        super().__init__()
        out_features = out_features or in_features
        hidden_features = hidden_features or in_features
        self.fc1 = nn.Linear(in_features, hidden_features)
        self.act = act_layer()
        if gate_layer is not None:
            assert hidden_features % 2 == 0
            self.gate = gate_layer(hidden_features)
            hidden_features = hidden_features // 2  # FIXME base reduction on gate property?
        else:
            self.gate = nn.Identity()
        self.fc2 = nn.Linear(hidden_features, out_features)
        self.drop = nn.Dropout(drop)

    def forward(self, x):
        x = self.fc1(x)
        x = self.act(x)
        x = self.drop(x)
        x = self.gate(x)
        x = self.fc2(x)
        x = self.drop(x)
        return x


class ConvMlp(nn.Module):
    """ MLP using 1x1 convs that keeps spatial dims
    """
    def __init__(
            self, in_features, hidden_features=None, out_features=None, act_layer=nn.ReLU, norm_layer=None, drop=0.):
        super().__init__()
        out_features = out_features or in_features
        hidden_features = hidden_features or in_features
        self.fc1 = nn.Conv2d(in_features, hidden_features, kernel_size=1, bias=True)
        self.norm = norm_layer(hidden_features) if norm_layer else nn.Identity()
        self.act = act_layer()
        self.fc2 = nn.Conv2d(hidden_features, out_features, kernel_size=1, bias=True)
        self.drop = nn.Dropout(drop)

    def forward(self, x):
        x = self.fc1(x)
        x = self.norm(x)
        x = self.act(x)
        x = self.drop(x)
        x = self.fc2(x)
        return x
