# Supplementary material
Source: ML conference proceedings conference paper supplement (https://proceedings.neurips.cc/paper_files/paper/2022/hash/342339109d7d756ef7bb30cf672aec02-Abstract.html)
Supplement: Supplementary file 1 [file 342339109d7d756ef7bb30cf672aec02-Supplemental-Conference.zip › T1_code/hollow/models/modules/vision_common.py]

# Adapted from https://github.com/rwightman/pytorch-image-models/blob/master/timm/models/vision_transformer.py
# and https://github.com/yitu-opensource/T2T-ViT/blob/main/models/transformer_block.py
import torch
import torch.nn as nn
import torch.nn.functional as F

from einops import rearrange

import hydra

from torchvision.ops import StochasticDepth

from hollow.models.modules.seq_common import Mlp


class AttentionSimple(nn.Module):
    """This attention class makes several simplifying assumptions (commonly satisfied in vision
       applications):
    1. q = k = v
    2. No masks: no attention mask, no key padding mask
    3. Embed dimension = Input dimension, i.e. projection matrices are square.
    """
    def __init__(self, dim, num_heads=8, qkv_bias=False, qk_scale=None, attn_drop=0., proj_drop=0.,
                 packed_linear=True, linear_cfg=None):
        """packed_linear: whether to pack all 3 q_proj, k_proj, v_proj into 2 matrix.
        This option is to be compatible with T2T-ViT pretrained weights, where there's only one
        projection weight matrix.
        """
        super().__init__()
        self.num_heads = num_heads
        head_dim = dim // num_heads

        self.scale = qk_scale or head_dim ** -0.5

        if linear_cfg is not None:
            packed_linear = False
        self.packed_linear = packed_linear
        if packed_linear:
            self.qkv = nn.Linear(dim, dim * 3, bias=qkv_bias)
        else:
            if linear_cfg is None:
                linear_cfg = {'_target_': 'torch.nn.Linear'}
            self.q_proj = hydra.utils.instantiate(linear_cfg, dim, dim, bias=qkv_bias,
                                                  _recursive_=False)
            self.k_proj = hydra.utils.instantiate(linear_cfg, dim, dim, bias=qkv_bias,
                                                  _recursive_=False)
            self.v_proj = hydra.utils.instantiate(linear_cfg, dim, dim, bias=qkv_bias,
                                                  _recursive_=False)

        self.attn_drop = nn.Dropout(attn_drop)
        self.proj = nn.Linear(dim, dim)
        self.proj_drop = nn.Dropout(proj_drop)

    def forward(self, x):
        B, N, C = x.shape
        if self.packed_linear:
            qkv = self.qkv(x).reshape(B, N, 3, self.num_heads, C // self.num_heads).permute(2, 0, 3, 1, 4)
            q, k, v = qkv[0], qkv[1], qkv[2]   # make torchscript happy (cannot use tensor as tuple)
        else:
            q, k, v = self.q_proj(x), self.k_proj(x), self.v_proj(x)
            q, k, v = [rearrange(x, 'b n (h d) -> b h n d', h=self.num_heads) for x in (q, k, v)]

        # attn = (q @ k.transpose(-2, -1) * self.scale)
        # Use `torch.baddbmm` (a bit more efficient w/ alpha param for scaling -- from Megatron-LM)
        bsz, num_heads, q_seq_len, dk = q.size()
        _, _, k_seq_len, _ = k.size()
        q = rearrange(q, 'b h t d -> (b h) t d')
        k = rearrange(k, 'b h s d -> (b h) d s')
        # Preallocate attn_weights for `baddbmm`
        attn = torch.empty(bsz * num_heads, q_seq_len, k_seq_len, dtype=q.dtype, device=q.device)
        attn = rearrange(torch.baddbmm(attn, q, k, beta=0, alpha=self.scale),
                         '(b h) t s -> b h t s', h = self.num_heads)

        attn = F.softmax(attn, dim=-1, dtype=v.dtype)
        attn = self.attn_drop(attn)

        x = (attn @ v).transpose(1, 2).reshape(B, N, C)
        x = self.proj(x)
        x = self.proj_drop(x)
        return x


class Block(nn.Module):

    def __init__(self, dim, num_heads, mlp_ratio=4., qkv_bias=False, qk_scale=None, drop=0., attn_drop=0.,
                 drop_path=0., act_layer=nn.GELU, norm_layer=nn.LayerNorm,
                 attnlinear_cfg=None, mlp_cfg=None):
        super().__init__()
        self.norm1 = norm_layer(dim)
        self.attn = AttentionSimple(
            dim, num_heads=num_heads, qkv_bias=qkv_bias, qk_scale=qk_scale, attn_drop=attn_drop, proj_drop=drop,
            linear_cfg=attnlinear_cfg)
        self.drop_path = StochasticDepth(drop_path, mode='row')
        self.norm2 = norm_layer(dim)
        mlp_hidden_dim = int(dim * mlp_ratio)
        if mlp_cfg is None:
            self.mlp = Mlp(in_features=dim, hidden_features=mlp_hidden_dim, act_layer=act_layer, drop=drop)
        else:
            self.mlp = hydra.utils.instantiate(mlp_cfg, in_features=dim, hidden_features=mlp_hidden_dim,
                                               act_layer=act_layer, drop=drop, _recursive_=False)

    def forward(self, x):
        x = x + self.drop_path(self.attn(self.norm1(x)))
        x = x + self.drop_path(self.mlp(self.norm2(x)))
        return x
