# Supplementary material
Source: ML conference proceedings conference paper supplement (https://proceedings.neurips.cc/paper_files/paper/2022/hash/342339109d7d756ef7bb30cf672aec02-Abstract.html)
Supplement: Supplementary file 1 [file 342339109d7d756ef7bb30cf672aec02-Supplemental-Conference.zip › T1_code/hollow/utils/numerics.py]

import torch
import math
import numpy as np


# def dct1d(x, half_shift=None):
#     N = x.shape[-1]
#     if half_shift == None:
#         half_shift = torch.stack([torch.tensor(-1j * math.pi * k / (2 * N)).exp() for k in range(N + 1)]).to(x.device)[None]
#     x_ext = torch.cat([x, x.flip(-1)], -1)
#     z = torch.fft.rfft(x_ext, norm='ortho') * half_shift
#     return z.real


# def dct2d(x, half_shift_x, half_shift_y):
#     Nx, Ny = x.shape[-2], x.shape[-1]
#     if half_shift_x == None:
#         half_shift_x = torch.stack([torch.tensor(-1j * math.pi * k / (2 * Nx)).exp() 
#             for k in range(2* Nx)]).to(x.device)[None, None, :, None]
#     if half_shift_y == None: 
#         half_shift_y = torch.stack([torch.tensor(-1j * math.pi * k / (2 * Ny)).exp() 
#             for k in range(Ny + 1)]).to(x.device)[None, None, None]

#     x_ext = torch.cat([x, x.flip(-1)], -1)
#     x_ext = torch.cat([x_ext, x_ext.flip(-2)], -2)

#     x_ext = torch.cat([x, x.flip(-1)], -1)
#     z = torch.fft.rfft2(x_ext, norm='ortho') * half_shift_x * half_shift_y
        
#     return z.real


def dct1d(x, norm=None):

    x_shape = x.shape
    N = x_shape[-1]
    x = x.contiguous().view(-1, N)

    v = torch.cat([x[:, ::2], x[:, 1::2].flip([1])], dim=1)

    Vc = torch.view_as_real(torch.fft.fft(v, dim=1))  # add this line

    k = - torch.arange(N, dtype=x.dtype, device=x.device)[None, :] * np.pi / (2 * N)
    W_r = torch.cos(k)
    W_i = torch.sin(k)

    V = Vc[:, :, 0] * W_r - Vc[:, :, 1] * W_i

    if norm == 'ortho':
        V[:, 0] /= np.sqrt(N) * 2
        V[:, 1:] /= np.sqrt(N / 2) * 2

    V = 2 * V.view(*x_shape)

    return V


def idct1d(X, norm=None):

    x_shape = X.shape
    N = x_shape[-1]

    X_v = X.contiguous().view(-1, x_shape[-1]) / 2

    if norm == 'ortho':
        X_v[:, 0] *= np.sqrt(N) * 2
        X_v[:, 1:] *= np.sqrt(N / 2) * 2

    k = torch.arange(x_shape[-1], dtype=X.dtype, device=X.device)[None, :] * np.pi / (2 * N)
    W_r = torch.cos(k)
    W_i = torch.sin(k)

    V_t_r = X_v
    V_t_i = torch.cat([X_v[:, :1] * 0, -X_v.flip([1])[:, :-1]], dim=1)

    V_r = V_t_r * W_r - V_t_i * W_i
    V_i = V_t_r * W_i + V_t_i * W_r

    V = torch.cat([V_r.unsqueeze(2), V_i.unsqueeze(2)], dim=2)

    
    # v = torch.irfft(V, 1, onesided=False)                             # comment this line
    v= torch.fft.irfft(torch.view_as_complex(V), n=V.shape[1], dim=1)   # add this line

    x = v.new_zeros(v.shape)
    x[:, ::2] += v[:, :N - (N // 2)]
    x[:, 1::2] += v.flip([1])[:, :N // 2]

    return x.view(*x_shape)

def dct2d(x, norm=None):
    """
    2-dimentional Discrete Cosine Transform, Type II (a.k.a. the DCT)
    For the meaning of the parameter `norm`, see:
    https://docs.scipy.org/doc/scipy-0.14.0/reference/generated/scipy.fftpack.dct.html
    :param x: the input signal
    :param norm: the normalization, None or 'ortho'
    :return: the DCT-II of the signal over the last 2 dimensions
    """
    X1 = dct1d(x, norm=norm)
    X2 = dct1d(X1.transpose(-1, -2), norm=norm)
    return X2.transpose(-1, -2)


def idct2d(X, norm=None):
    """
    The inverse to 2D DCT-II, which is a scaled Discrete Cosine Transform, Type III
    Our definition of idct is that idct_2d(dct_2d(x)) == x
    For the meaning of the parameter `norm`, see:
    https://docs.scipy.org/doc/scipy-0.14.0/reference/generated/scipy.fftpack.dct.html
    :param X: the input signal
    :param norm: the normalization, None or 'ortho'
    :return: the DCT-II of the signal over the last 2 dimensions
    """
    x1 = idct1d(X, norm=norm)
    x2 = idct1d(x1.transpose(-1, -2), norm=norm)
    return x2.transpose(-1, -2)
