# Supplementary material
Source: ML conference proceedings conference paper supplement (https://proceedings.neurips.cc/paper_files/paper/2022/hash/342339109d7d756ef7bb30cf672aec02-Abstract.html)
Supplement: Supplementary file 1 [file 342339109d7d756ef7bb30cf672aec02-Supplemental-Conference.zip › T1_code/pip_freeze.txt]

absl-py==1.0.0
aiohttp @ file:///tmp/build/80754af9/aiohttp_1646806365504/work
aiosignal @ file:///tmp/build/80754af9/aiosignal_1637843061372/work
alabaster @ file:///home/ktietz/src/ci/alabaster_1611921544520/work
alembic==1.6.5
anaconda-client @ file:///tmp/build/80754af9/anaconda-client_1635342557008/work
anaconda-navigator==2.1.4
anaconda-project @ file:///tmp/build/80754af9/anaconda-project_1637161053845/work
antlr4-python3-runtime==4.8
anyio @ file:///tmp/build/80754af9/anyio_1644463572971/work/dist
appdirs==1.4.4
argon2-cffi @ file:///opt/conda/conda-bld/argon2-cffi_1645000214183/work
argon2-cffi-bindings @ file:///tmp/build/80754af9/argon2-cffi-bindings_1644569679365/work
arrow @ file:///opt/conda/conda-bld/arrow_1649166651673/work
astroid @ file:///tmp/build/80754af9/astroid_1628063140030/work
astropy @ file:///opt/conda/conda-bld/astropy_1650891077797/work
asttokens @ file:///opt/conda/conda-bld/asttokens_1646925590279/work
async-timeout @ file:///tmp/build/80754af9/async-timeout_1637851218186/work
atomicwrites==1.4.0
attrs @ file:///opt/conda/conda-bld/attrs_1642510447205/work
Automat @ file:///tmp/build/80754af9/automat_1600298431173/work
autopage==0.5.0
autopep8 @ file:///opt/conda/conda-bld/autopep8_1639166893812/work
Babel @ file:///tmp/build/80754af9/babel_1620871417480/work
backcall @ file:///home/ktietz/src/ci/backcall_1611930011877/work
backports.functools-lru-cache @ file:///tmp/build/80754af9/backports.functools_lru_cache_1618170165463/work
backports.tempfile @ file:///home/linux1/recipes/ci/backports.tempfile_1610991236607/work
backports.weakref==1.0.post1
bcrypt @ file:///tmp/build/80754af9/bcrypt_1607022650461/work
beautifulsoup4 @ file:///opt/conda/conda-bld/beautifulsoup4_1650462163268/work
binaryornot @ file:///tmp/build/80754af9/binaryornot_1617751525010/work
bitarray @ file:///tmp/build/80754af9/bitarray_1648739490228/work
bkcharts==0.2
black==19.10b0
bleach @ file:///opt/conda/conda-bld/bleach_1641577558959/work
bokeh @ file:///tmp/build/80754af9/bokeh_1638362822154/work
boto3 @ file:///opt/conda/conda-bld/boto3_1649078879353/work
botocore @ file:///opt/conda/conda-bld/botocore_1649076662316/work
Bottleneck @ file:///tmp/build/80754af9/bottleneck_1648028898966/work
brotlipy==0.7.0
cachetools @ file:///tmp/build/80754af9/cachetools_1619597386817/work
certifi==2021.10.8
cffi @ file:///opt/conda/conda-bld/cffi_1642701102775/work
chardet @ file:///tmp/build/80754af9/chardet_1607706775000/work
charset-normalizer @ file:///tmp/build/80754af9/charset-normalizer_1630003229654/work
click @ file:///tmp/build/80754af9/click_1646056590078/work
cliff==3.10.1
cloudpickle @ file:///tmp/build/80754af9/cloudpickle_1632508026186/work
clyent==1.2.2
cmaes==0.8.2
cmd2==2.4.1
colorama @ file:///tmp/build/80754af9/colorama_1607707115595/work
colorcet @ file:///tmp/build/80754af9/colorcet_1611168489822/work
colorlog==6.6.0
commonmark==0.9.1
conda==4.12.0
conda-build==3.21.8
conda-content-trust @ file:///tmp/build/80754af9/conda-content-trust_1617045594566/work
conda-pack @ file:///tmp/build/80754af9/conda-pack_1611163042455/work
conda-package-handling @ file:///tmp/build/80754af9/conda-package-handling_1649105784853/work
conda-repo-cli @ file:///tmp/build/80754af9/conda-repo-cli_1620168426516/work
conda-token @ file:///tmp/build/80754af9/conda-token_1620076980546/work
conda-verify==3.4.2
constantly==15.1.0
cookiecutter @ file:///opt/conda/conda-bld/cookiecutter_1649151442564/work
cryptography @ file:///tmp/build/80754af9/cryptography_1633520369886/work
cssselect==1.1.0
cycler @ file:///tmp/build/80754af9/cycler_1637851556182/work
Cython @ file:///tmp/build/80754af9/cython_1647850345254/work
cytoolz==0.11.0
daal4py==2021.5.0
dask @ file:///opt/conda/conda-bld/dask-core_1647268715755/work
data==0.4
datasets==2.2.1
datashader @ file:///tmp/build/80754af9/datashader_1623782308369/work
datashape==0.5.4
debugpy @ file:///tmp/build/80754af9/debugpy_1637091799509/work
decorator @ file:///opt/conda/conda-bld/decorator_1643638310831/work
defusedxml @ file:///tmp/build/80754af9/defusedxml_1615228127516/work
diff-match-patch @ file:///Users/ktietz/demo/mc3/conda-bld/diff-match-patch_1630511840874/work
dill==0.3.4
distributed @ file:///opt/conda/conda-bld/distributed_1647271944416/work
docker-pycreds==0.4.0
docutils @ file:///tmp/build/80754af9/docutils_1620827980776/work
einops==0.4.1
entrypoints @ file:///tmp/build/80754af9/entrypoints_1649926439650/work
et-xmlfile==1.1.0
executing @ file:///opt/conda/conda-bld/executing_1646925071911/work
fastjsonschema @ file:///tmp/build/80754af9/python-fastjsonschema_1620414857593/work/dist
filelock @ file:///opt/conda/conda-bld/filelock_1647002191454/work
flake8 @ file:///tmp/build/80754af9/flake8_1620776156532/work
Flask @ file:///home/ktietz/src/ci/flask_1611932660458/work
fonttools==4.25.0
frozenlist @ file:///tmp/build/80754af9/frozenlist_1637767113340/work
fsspec @ file:///opt/conda/conda-bld/fsspec_1647268051896/work
funcsigs==1.0.2
future @ file:///tmp/build/80754af9/future_1607571303524/work
gdown==4.4.0
gensim @ file:///tmp/build/80754af9/gensim_1646806807927/work
gitdb==4.0.9
GitPython==3.1.27
glob2 @ file:///home/linux1/recipes/ci/glob2_1610991677669/work
gmpy2 @ file:///tmp/build/80754af9/gmpy2_1645438755360/work
google-api-core @ file:///C:/ci/google-api-core-split_1613980333946/work
google-auth @ file:///tmp/build/80754af9/google-auth_1626320605116/work
google-auth-oauthlib==0.4.6
google-cloud-core @ file:///tmp/build/80754af9/google-cloud-core_1625077425256/work
google-cloud-storage @ file:///tmp/build/80754af9/google-cloud-storage_1601307969662/work
google-crc32c @ file:///tmp/build/80754af9/google-crc32c_1612242928148/work
google-resumable-media @ file:///tmp/build/80754af9/google-resumable-media_1624367812531/work
googleapis-common-protos @ file:///tmp/build/80754af9/googleapis-common-protos-feedstock_1617957652138/work
greenlet @ file:///tmp/build/80754af9/greenlet_1628888132713/work
grpcio @ file:///tmp/build/80754af9/grpcio_1637590821884/work
h5py @ file:///tmp/build/80754af9/h5py_1637138488546/work
HeapDict @ file:///Users/ktietz/demo/mc3/conda-bld/heapdict_1630598515714/work
holoviews @ file:///opt/conda/conda-bld/holoviews_1645454331194/work
huggingface-hub==0.6.0
hvplot @ file:///tmp/build/80754af9/hvplot_1627305124151/work
hydra-colorlog==1.1.0
hydra-core==1.1.2
hydra-optuna-sweeper==1.1.2
hyperlink @ file:///tmp/build/80754af9/hyperlink_1610130746837/work
idna @ file:///tmp/build/80754af9/idna_1637925883363/work
imagecodecs @ file:///tmp/build/80754af9/imagecodecs_1635529108216/work
imageio @ file:///tmp/build/80754af9/imageio_1617700267927/work
imagesize @ file:///tmp/build/80754af9/imagesize_1637939814114/work
importlib-metadata @ file:///tmp/build/80754af9/importlib-metadata_1648544546694/work
incremental @ file:///tmp/build/80754af9/incremental_1636629750599/work
inflection==0.5.1
iniconfig @ file:///home/linux1/recipes/ci/iniconfig_1610983019677/work
intake @ file:///opt/conda/conda-bld/intake_1647436631684/work
intervaltree @ file:///Users/ktietz/demo/mc3/conda-bld/intervaltree_1630511889664/work
ipykernel @ file:///tmp/build/80754af9/ipykernel_1647000773790/work/dist/ipykernel-6.9.1-py3-none-any.whl
ipython @ file:///tmp/build/80754af9/ipython_1648817057602/work
ipython-genutils @ file:///tmp/build/80754af9/ipython_genutils_1606773439826/work
ipywidgets @ file:///tmp/build/80754af9/ipywidgets_1634143127070/work
isort @ file:///tmp/build/80754af9/isort_1628603791788/work
itemadapter @ file:///tmp/build/80754af9/itemadapter_1626442940632/work
itemloaders @ file:///opt/conda/conda-bld/itemloaders_1646805235997/work
itsdangerous @ file:///tmp/build/80754af9/itsdangerous_1621432558163/work
jdcal @ file:///Users/ktietz/demo/mc3/conda-bld/jdcal_1630584345063/work
jedi @ file:///tmp/build/80754af9/jedi_1644297102865/work
jeepney @ file:///tmp/build/80754af9/jeepney_1627537048313/work
Jinja2 @ file:///tmp/build/80754af9/jinja2_1612213139570/work
jinja2-time @ file:///opt/conda/conda-bld/jinja2-time_1649251842261/work
jmespath @ file:///Users/ktietz/demo/mc3/conda-bld/jmespath_1630583964805/work
joblib @ file:///tmp/build/80754af9/joblib_1635411271373/work
json5 @ file:///tmp/build/80754af9/json5_1624432770122/work
jsonschema @ file:///tmp/build/80754af9/jsonschema_1650025953207/work
jupyter @ file:///tmp/build/80754af9/jupyter_1607700846274/work
jupyter-client @ file:///tmp/build/80754af9/jupyter_client_1616770841739/work
jupyter-console @ file:///tmp/build/80754af9/jupyter_console_1616615302928/work
jupyter-core @ file:///tmp/build/80754af9/jupyter_core_1646976314572/work
jupyter-server @ file:///opt/conda/conda-bld/jupyter_server_1644494914632/work
jupyterlab @ file:///opt/conda/conda-bld/jupyterlab_1647445413472/work
jupyterlab-pygments @ file:///tmp/build/80754af9/jupyterlab_pygments_1601490720602/work
jupyterlab-server @ file:///opt/conda/conda-bld/jupyterlab_server_1644500396812/work
jupyterlab-widgets @ file:///tmp/build/80754af9/jupyterlab_widgets_1609884341231/work
keyring @ file:///tmp/build/80754af9/keyring_1638531355686/work
kiwisolver @ file:///opt/conda/conda-bld/kiwisolver_1638569886207/work
latex==0.7.0
lazy-object-proxy @ file:///tmp/build/80754af9/lazy-object-proxy_1616529027849/work
libarchive-c @ file:///tmp/build/80754af9/python-libarchive-c_1617780486945/work
lightning-bolts==0.5.0
llvmlite==0.38.0
locket @ file:///tmp/build/80754af9/locket_1647006009810/work
lxml @ file:///tmp/build/80754af9/lxml_1646624513062/work
Mako==1.2.0
Markdown @ file:///tmp/build/80754af9/markdown_1614363852612/work
MarkupSafe @ file:///tmp/build/80754af9/markupsafe_1621523467000/work
mat73==0.59
matplotlib @ file:///tmp/build/80754af9/matplotlib-suite_1647441664166/work
matplotlib-inline @ file:///tmp/build/80754af9/matplotlib-inline_1628242447089/work
mccabe==0.6.1
mistune @ file:///tmp/build/80754af9/mistune_1607364877025/work
mkl-fft==1.3.1
mkl-random @ file:///tmp/build/80754af9/mkl_random_1626186066731/work
mkl-service==2.4.0
mock @ file:///tmp/build/80754af9/mock_1607622725907/work
more-itertools==8.13.0
mpmath==1.2.1
msgpack @ file:///tmp/build/80754af9/msgpack-python_1612287166301/work
multidict @ file:///opt/conda/conda-bld/multidict_1640703752579/work
multipledispatch @ file:///tmp/build/80754af9/multipledispatch_1607574243360/work
multiprocess==0.70.12.2
munkres==1.1.4
mypy-extensions==0.4.3
navigator-updater==0.2.1
nbclassic @ file:///opt/conda/conda-bld/nbclassic_1644943264176/work
nbclient @ file:///tmp/build/80754af9/nbclient_1650290509967/work
nbconvert @ file:///opt/conda/conda-bld/nbconvert_1649751911790/work
nbformat @ file:///tmp/build/80754af9/nbformat_1649826788557/work
nest-asyncio @ file:///tmp/build/80754af9/nest-asyncio_1649847906199/work
networkx @ file:///opt/conda/conda-bld/networkx_1647437648384/work
nltk @ file:///opt/conda/conda-bld/nltk_1645628263994/work
nose @ file:///opt/conda/conda-bld/nose_1642704612149/work
notebook @ file:///tmp/build/80754af9/notebook_1645002532094/work
numba @ file:///opt/conda/conda-bld/numba_1648040517072/work
numexpr @ file:///tmp/build/80754af9/numexpr_1640689833592/work
numpy @ file:///tmp/build/80754af9/numpy_and_numpy_base_1649764630438/work
numpydoc @ file:///opt/conda/conda-bld/numpydoc_1643788541039/work
oauthlib==3.2.0
olefile @ file:///Users/ktietz/demo/mc3/conda-bld/olefile_1629805411829/work
omegaconf==2.1.2
openpyxl @ file:///tmp/build/80754af9/openpyxl_1632777717936/work
optuna==2.10.0
packaging @ file:///tmp/build/80754af9/packaging_1637314298585/work
pandas==1.4.2
pandocfilters @ file:///opt/conda/conda-bld/pandocfilters_1643405455980/work
panel @ file:///opt/conda/conda-bld/panel_1650637168846/work
param @ file:///tmp/build/80754af9/param_1636647414893/work
parsel @ file:///tmp/build/80754af9/parsel_1646722533460/work
parso @ file:///opt/conda/conda-bld/parso_1641458642106/work
partd @ file:///opt/conda/conda-bld/partd_1647245470509/work
pathspec==0.7.0
pathtools==0.1.2
patsy==0.5.2
pbr==5.9.0
pep8==1.7.1
pexpect @ file:///tmp/build/80754af9/pexpect_1605563209008/work
pickleshare @ file:///tmp/build/80754af9/pickleshare_1606932040724/work
Pillow==9.0.1
pkginfo @ file:///tmp/build/80754af9/pkginfo_1643162084911/work
plotly @ file:///opt/conda/conda-bld/plotly_1646671701182/work
pluggy @ file:///tmp/build/80754af9/pluggy_1648024445381/work
poyo @ file:///tmp/build/80754af9/poyo_1617751526755/work
prettytable==3.3.0
prometheus-client @ file:///opt/conda/conda-bld/prometheus_client_1643788673601/work
promise==2.3
prompt-toolkit @ file:///tmp/build/80754af9/prompt-toolkit_1633440160888/work
Protego @ file:///tmp/build/80754af9/protego_1598657180827/work
protobuf==3.19.1
psutil @ file:///tmp/build/80754af9/psutil_1612297992929/work
ptflops==0.6.9
pthflops==0.4.1
ptyprocess @ file:///tmp/build/80754af9/ptyprocess_1609355006118/work/dist/ptyprocess-0.7.0-py2.py3-none-any.whl
pure-eval @ file:///opt/conda/conda-bld/pure_eval_1646925070566/work
py @ file:///opt/conda/conda-bld/py_1644396412707/work
pyarrow==8.0.0
pyasn1 @ file:///Users/ktietz/demo/mc3/conda-bld/pyasn1_1629708007385/work
pyasn1-modules==0.2.8
pycodestyle @ file:///tmp/build/80754af9/pycodestyle_1615748559966/work
pycosat==0.6.3
pycparser @ file:///tmp/build/80754af9/pycparser_1636541352034/work
pyct @ file:///tmp/build/80754af9/pyct_1613411549454/work
pycurl==7.44.1
pyDeprecate==0.3.2
PyDispatcher==2.0.5
pydocstyle @ file:///tmp/build/80754af9/pydocstyle_1621600989141/work
pyerfa @ file:///tmp/build/80754af9/pyerfa_1621556109336/work
pyflakes @ file:///tmp/build/80754af9/pyflakes_1617200973297/work
Pygments @ file:///opt/conda/conda-bld/pygments_1644249106324/work
PyHamcrest @ file:///tmp/build/80754af9/pyhamcrest_1615748656804/work
PyJWT @ file:///tmp/build/80754af9/pyjwt_1619682484438/work
pylint @ file:///tmp/build/80754af9/pylint_1627536788603/work
pyls-spyder==0.4.0
pyodbc @ file:///tmp/build/80754af9/pyodbc_1647425888968/work
pyOpenSSL @ file:///tmp/build/80754af9/pyopenssl_1635333100036/work
pyparsing @ file:///tmp/build/80754af9/pyparsing_1635766073266/work
pyperclip==1.8.2
pyrsistent @ file:///tmp/build/80754af9/pyrsistent_1636110951836/work
PySocks @ file:///tmp/build/80754af9/pysocks_1605305812635/work
pytest==7.1.1
python-dateutil @ file:///tmp/build/80754af9/python-dateutil_1626374649649/work
python-dotenv==0.20.0
python-editor==1.0.4
python-lsp-black @ file:///tmp/build/80754af9/python-lsp-black_1634232156041/work
python-lsp-jsonrpc==1.0.0
python-lsp-server==1.2.4
python-slugify @ file:///tmp/build/80754af9/python-slugify_1620405669636/work
python-snappy @ file:///tmp/build/80754af9/python-snappy_1610133040135/work
pytorch-lightning==1.6.3
pytz==2021.3
pyviz-comms @ file:///tmp/build/80754af9/pyviz_comms_1623747165329/work
PyWavelets @ file:///tmp/build/80754af9/pywavelets_1648710015787/work
pyxdg @ file:///tmp/build/80754af9/pyxdg_1603822279816/work
PyYAML==6.0
pyzmq @ file:///tmp/build/80754af9/pyzmq_1638434985866/work
QDarkStyle @ file:///tmp/build/80754af9/qdarkstyle_1617386714626/work
qstylizer @ file:///tmp/build/80754af9/qstylizer_1617713584600/work/dist/qstylizer-0.1.10-py2.py3-none-any.whl
QtAwesome @ file:///tmp/build/80754af9/qtawesome_1637160816833/work
qtconsole @ file:///opt/conda/conda-bld/qtconsole_1649078897110/work
QtPy @ file:///opt/conda/conda-bld/qtpy_1649073884068/work
queuelib==1.5.0
regex @ file:///tmp/build/80754af9/regex_1648447707500/work
requests @ file:///opt/conda/conda-bld/requests_1641824580448/work
requests-file @ file:///Users/ktietz/demo/mc3/conda-bld/requests-file_1629455781986/work
requests-oauthlib==1.3.1
responses==0.18.0
rich==12.4.1
rope @ file:///opt/conda/conda-bld/rope_1643788605236/work
rsa @ file:///tmp/build/80754af9/rsa_1614366226499/work
Rtree @ file:///tmp/build/80754af9/rtree_1618420843093/work
ruamel-yaml-conda @ file:///tmp/build/80754af9/ruamel_yaml_1616016711199/work
s3transfer @ file:///tmp/build/80754af9/s3transfer_1626435152308/work
scikit-image @ file:///tmp/build/80754af9/scikit-image_1648214171611/work
scikit-learn @ file:///tmp/build/80754af9/scikit-learn_1642617106979/work
scikit-learn-intelex==2021.20220215.212715
scipy @ file:///tmp/build/80754af9/scipy_1641555004408/work
Scrapy @ file:///tmp/build/80754af9/scrapy_1646837771788/work
seaborn @ file:///tmp/build/80754af9/seaborn_1629307859561/work
SecretStorage @ file:///tmp/build/80754af9/secretstorage_1614022780358/work
Send2Trash @ file:///tmp/build/80754af9/send2trash_1632406701022/work
sentry-sdk==1.5.12
service-identity @ file:///Users/ktietz/demo/mc3/conda-bld/service_identity_1629460757137/work
setproctitle==1.2.3
shortuuid==1.0.9
shutilwhich==1.1.0
sip==4.19.13
six @ file:///tmp/build/80754af9/six_1644875935023/work
smart-open @ file:///tmp/build/80754af9/smart_open_1623928409369/work
smmap==5.0.0
sniffio @ file:///tmp/build/80754af9/sniffio_1614030464178/work
snowballstemmer @ file:///tmp/build/80754af9/snowballstemmer_1637937080595/work
sortedcollections @ file:///tmp/build/80754af9/sortedcollections_1611172717284/work
sortedcontainers @ file:///tmp/build/80754af9/sortedcontainers_1623949099177/work
soupsieve @ file:///tmp/build/80754af9/soupsieve_1636706018808/work
Sphinx @ file:///opt/conda/conda-bld/sphinx_1643644169832/work
sphinxcontrib-applehelp @ file:///home/ktietz/src/ci/sphinxcontrib-applehelp_1611920841464/work
sphinxcontrib-devhelp @ file:///home/ktietz/src/ci/sphinxcontrib-devhelp_1611920923094/work
sphinxcontrib-htmlhelp @ file:///tmp/build/80754af9/sphinxcontrib-htmlhelp_1623945626792/work
sphinxcontrib-jsmath @ file:///home/ktietz/src/ci/sphinxcontrib-jsmath_1611920942228/work
sphinxcontrib-qthelp @ file:///home/ktietz/src/ci/sphinxcontrib-qthelp_1611921055322/work
sphinxcontrib-serializinghtml @ file:///tmp/build/80754af9/sphinxcontrib-serializinghtml_1624451540180/work
spyder @ file:///tmp/build/80754af9/spyder_1636479868270/work
spyder-kernels @ file:///tmp/build/80754af9/spyder-kernels_1634236920897/work
SQLAlchemy @ file:///tmp/build/80754af9/sqlalchemy_1647581680159/work
stack-data @ file:///opt/conda/conda-bld/stack_data_1646927590127/work
statsmodels @ file:///tmp/build/80754af9/statsmodels_1648015433305/work
stevedore==3.5.0
sympy @ file:///tmp/build/80754af9/sympy_1647853653589/work
tables @ file:///tmp/build/80754af9/pytables_1607975397488/work
tabulate==0.8.9
TBB==0.2
tblib @ file:///Users/ktietz/demo/mc3/conda-bld/tblib_1629402031467/work
tempdir==0.7.1
tenacity @ file:///tmp/build/80754af9/tenacity_1626248292117/work
tensorboard==2.9.0
tensorboard-data-server==0.6.1
tensorboard-plugin-wit==1.8.1
terminado @ file:///tmp/build/80754af9/terminado_1644322582718/work
testpath @ file:///tmp/build/80754af9/testpath_1624638946665/work
text-unidecode @ file:///Users/ktietz/demo/mc3/conda-bld/text-unidecode_1629401354553/work
textdistance @ file:///tmp/build/80754af9/textdistance_1612461398012/work
threadpoolctl @ file:///Users/ktietz/demo/mc3/conda-bld/threadpoolctl_1629802263681/work
three-merge @ file:///tmp/build/80754af9/three-merge_1607553261110/work
tifffile @ file:///tmp/build/80754af9/tifffile_1627275862826/work
tikzplotlib==0.10.1
timm==0.5.4
tinycss @ file:///tmp/build/80754af9/tinycss_1617713798712/work
tldextract @ file:///opt/conda/conda-bld/tldextract_1646638314385/work
toml @ file:///tmp/build/80754af9/toml_1616166611790/work
tomli @ file:///tmp/build/80754af9/tomli_1637314251069/work
toolz @ file:///tmp/build/80754af9/toolz_1636545406491/work
torch==1.11.0
torchaudio==0.11.0
torchmetrics==0.8.2
torchvision==0.12.0
tornado @ file:///tmp/build/80754af9/tornado_1606942317143/work
tqdm @ file:///opt/conda/conda-bld/tqdm_1650891076910/work
traitlets @ file:///tmp/build/80754af9/traitlets_1636710298902/work
Twisted @ file:///tmp/build/80754af9/twisted_1646835200521/work
typed-ast @ file:///tmp/build/80754af9/typed-ast_1624953673314/work
typing_extensions @ file:///opt/conda/conda-bld/typing_extensions_1647553014482/work
ujson @ file:///tmp/build/80754af9/ujson_1648025916270/work
Unidecode @ file:///tmp/build/80754af9/unidecode_1614712377438/work
urllib3 @ file:///opt/conda/conda-bld/urllib3_1650639997961/work
w3lib @ file:///Users/ktietz/demo/mc3/conda-bld/w3lib_1629359764703/work
wandb==0.12.16
watchdog @ file:///tmp/build/80754af9/watchdog_1638367282716/work
wcwidth @ file:///Users/ktietz/demo/mc3/conda-bld/wcwidth_1629357192024/work
webcolors==1.11.1
webencodings==0.5.1
websocket-client @ file:///tmp/build/80754af9/websocket-client_1614803975924/work
Werkzeug @ file:///opt/conda/conda-bld/werkzeug_1645628268370/work
widgetsnbextension @ file:///tmp/build/80754af9/widgetsnbextension_1644992802045/work
wrapt @ file:///tmp/build/80754af9/wrapt_1607574498026/work
wurlitzer @ file:///tmp/build/80754af9/wurlitzer_1638368168359/work
xarray @ file:///opt/conda/conda-bld/xarray_1639166117697/work
xlrd @ file:///tmp/build/80754af9/xlrd_1608072521494/work
XlsxWriter @ file:///opt/conda/conda-bld/xlsxwriter_1649073856329/work
xxhash==3.0.0
yapf @ file:///tmp/build/80754af9/yapf_1615749224965/work
yarl @ file:///tmp/build/80754af9/yarl_1606939947528/work
zict==2.0.0
zipp @ file:///opt/conda/conda-bld/zipp_1641824620731/work
zope.interface @ file:///tmp/build/80754af9/zope.interface_1625036153595/work
