# Supplementary material
Source: ML conference proceedings conference paper supplement (https://proceedings.neurips.cc/paper_files/paper/2022/hash/342339109d7d756ef7bb30cf672aec02-Abstract.html)
Supplement: Supplementary file 1 [file 342339109d7d756ef7bb30cf672aec02-Supplemental-Conference.zip › T1_code/README.md]

# Transform Once: Efficient Operator Learning in Frequency Domain

We use the template from `https://github.com/ashleve/lightning-hydra-template`.

All requirements are listed under `requirements.txt`. A pip freeze snapshot is provided in `pip_freeze.txt`.

Example launch for Navier-Stokes high-viscosity

```
./scripts/launch/navier-stokes/high-viscosity/run_t1.sh
```
