# Supplementary material
Source: ML conference proceedings conference paper supplement (https://proceedings.neurips.cc/paper_files/paper/2022/hash/342339109d7d756ef7bb30cf672aec02-Abstract.html)
Supplement: Supplementary file 1 [file 342339109d7d756ef7bb30cf672aec02-Supplemental-Conference.zip › T1_code/requirements.txt]

python-dotenv
pytorch-lightning
hydra-core
hydra-colorlog
hydra-optuna-sweeper
omegaconf
matplotlib
rich
timm
einops
datasets
gdown
wandb
more-itertools
lightning-bolts
mat73
