# Supplementary material
Source: ML conference proceedings conference paper supplement (https://proceedings.neurips.cc/paper_files/paper/2022/hash/342339109d7d756ef7bb30cf672aec02-Abstract.html)
Supplement: Supplementary file 1 [file 342339109d7d756ef7bb30cf672aec02-Supplemental-Conference.zip › T1_code/scripts/launch/dfp128/unet.sh]

#!/bin/bash

seed=$RANDOM

# manual control of device id. This is required so that running jobs to not read 
# different devices id from the config
export CUDA_VISIBLE_DEVICES=3


for run in 1
do
    seed=$RANDOM
    python3 run.py \
        experiment=dfp128/unet \
        seed=$seed \
        datamodule.dataset_size=10000\
        model.channel_exponent=6 \
        logger.wandb.project=table2-medium \
        logger.wandb.entity="anonymous-research" \
        logger.wandb.name=unet-c6
done

for run in 1
do
    seed=$RANDOM
    python3 run.py \
        experiment=dfp128/unet \
        seed=$seed \
        datamodule.dataset_size=10000\
        model.channel_exponent=7 \
        logger.wandb.project=table2-medium \
        logger.wandb.entity="anonymous-research" \
        logger.wandb.name=unet-c7
done
