# Supplementary material
Source: ML conference proceedings conference paper supplement (https://proceedings.neurips.cc/paper_files/paper/2022/hash/342339109d7d756ef7bb30cf672aec02-Abstract.html)
Supplement: Supplementary file 1 [file 342339109d7d756ef7bb30cf672aec02-Supplemental-Conference.zip › T1_code/scripts/launch/navier-stokes/high_viscosity/run_t1u.sh]

#!/bin/bash

export CUDA_VISIBLE_DEVICES=3

for run in 1 2 3 4 5 6 7 8
do
seed=$RANDOM
python3 run.py \
    experiment=navier-stokes/t1u \
    seed=$seed \
    datamodule.viscosity=1e-3 \
    datamodule.batch_size=64 \
    model.weight_init=1 \
    model.channel_exponent=6 \
    model.use_operator_layer=True \
    logger.wandb.project=table1-high-viscosity-v2  \
    logger.wandb.entity="anonymous-research" \
    logger.wandb.name=t1u-i1-m24-c6
done

for run in 1 2 3 4 5 6 7 8
do
seed=$RANDOM
python3 run.py \
    experiment=navier-stokes/t1u \
    seed=$seed \
    datamodule.viscosity=1e-3 \
    datamodule.batch_size=64 \
    model.weight_init=2 \
    model.channel_exponent=6 \
    model.use_operator_layer=True \
    logger.wandb.project=table1-high-viscosity-v2  \
    logger.wandb.entity="anonymous-research" \
    logger.wandb.name=t1u-i2-m24-c6
done
